# Supplementary material
Source: Springer Nature journal article supplement (https://www.springermedizin.de/resource/supplementary/12885_2008_1497_MOESM6_ESM.pdf/9472166)

# miR-21 ISH on IDC

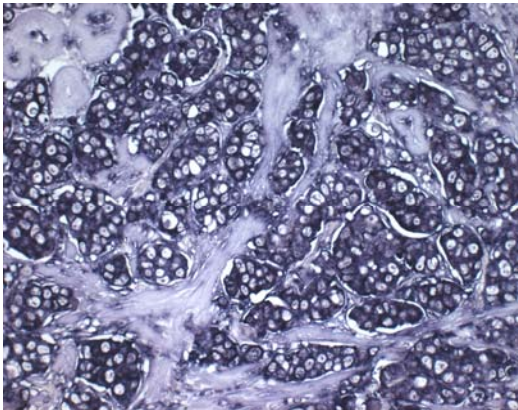

Supplement: MOESM6 [file 9472166]
